# Supplementary material for: Pre-emptive Breeding Against Karnal Bunt Infection in Common Wheat: Combining Genomic and Agronomic Information to Identify Suitable Parents
Source: Front Plant Sci. 2021 Jul 29;12:675859. doi: 10.3389/fpls.2021.675859 (PMC8358121; doi:10.3389/fpls.2021.675859)
Supplement: Supplementary file 1 [file Table_1.XLSX]

## Sheet: Sheet1
Index	variety	Pop	released	Pedigree	Locality
1	AC-Domain	Pop4	1993	BW-83/ND-585	CAN
2	AC-Snowbird	Pop4	2000	RL-4137-W/AC-DOMAIN	CAN
3	AGT-Correll	Pop4	2006	RAC-875/YITPI	AUS
4	AGT-Scythe	Pop4	2005	CO-4080-109/CO-3749-009	AUS
5	Agt-Young	Pop1	2005	VPM-1/3*BEULAH//SILVERSTAR	AUS
6	Angus	Pop4	1978	THATCHER/2*SUPREZA/3/FRONTANA//KENYA-58/NEWTHATCH/7/PEMBINA//FRONTANA/5*THATCHER/6/MIDA//KENYA-117-A/2*THATCHER/3/FRONTANA/4*THATCHER/4/MN-III-58-4/5/KENYA-58/NEWTHATCH//3*LEE	USA
7	Annuello	Pop1	2001	PAVON(SIB)/TM-56(VF-665)//JANZ	AUS
8	Aroona	Pop4	1981	WW-15/RAVEN	AUS
9	Arrino	Pop4	1997	77-W-660/ERADU	AUS
10	Axe	Pop4	2007	(DH)RAC-875//EXCALIBUR/KUKRI/3/RAC-875//EXCALIBUR/KUKRI	AUS
11	Banks	Pop1	1979	PWTH/(SIB)CONDOR//2*CONDOR	AUS
12	Barham	Pop4	2006	BOWIE,AUS//BERSEE/3*BINDAWARRA-126937/3/BOWIE,AUS	AUS
13	Batavia	Pop1	1991	BROCHIS(SIB)/BANKS	AUS
14	Baxter	Pop1	1998	INIA-66/GAMUT//COOK/4/JUPATECO/3/LERMA-ROJO-64/SONORA-64-A//(SIB)TIMGALEN[2854][3766]; QT-2327/COOK//QT-2804	AUS
15	Berkut	Pop4	2002	IRENA/BAVIACORA-M-92//PASTOR	MEX
16	Binnu	Pop4	2006	ARRINO/Y-89-4034	AUS
17	Bolac	Pop1	2006	NESSER/2*VI-252	AUS
18	Borlaug-M-95	Pop4	1995	HAHN*2/PARULA	MEX
19	Braewood	Pop1	2001	COOK*4/VPM-1	AUS
20	Brookton	Pop4	1997	76-W-595//CRANBROOK/TORRES	AUS
21	Calingiri	Pop4	1997	CHINO/KULIN//REEVES	AUS
22	Camm	Pop2	1998	SPEAR*4//VPM-1/5*COOK	AUS
23	Carazinho	Pop4	1957	COLONISTA/FRONTANA	BRA
24	Carinya	Pop1	2008	JANZ*4/SUNVALE	AUS
25	Carnamah	Pop4	1996	BOLSENA-1-CH(RAC-529)/77-W-660	AUS
26	Chara	Pop1	1998	BD-225/CD-87	AUS
27	Chuan-Mai-18	Pop4	1965	69-1776/663	CHN
28	CIM12-15	Pop3	NA	SAUAL/4/CROC_1/AE.SQUARROSA (205)//KAUZ/3/ATTILA/5/SAUAL	MEX
29	Clearfield-Jnz	Pop1	2001	JANZ*4/FIDEL[3758]; JANZ*4/FIDEL-FS-2	AUS
30	Cleopatra-74	Pop4	1974	BLUEBIRD/3/2*INIA-66/NAPO-63//II-20350/4/F2-UNKNOWN[114][144]; BLUEBIRD/3/INIA-66(SIB)/NAPO-63*2//II-20350	MEX
31	Columbus	Pop4	1980	NEEPAWA*6/RL-4137	CAN
32	Cook	Pop1	1977	TIMGALEN/(SIB)CONDOR//CONDOR	AUS
33	Cranbrook	Pop4	1985	WREN,MEX//CIANO-67(SIB)/NOROESTE-66/3/ZAMBEZI	AUS
34	Cunningham	Pop1	1990	3-AG-3/4*CONDOR//COOK	AUS
35	Derrimut	Pop1	2006	VN-150/VN-715	AUS
36	Diamondbird	Pop4	1997	VICAM-71//CIANO-67/SIETE-CERROS-66/3/KALYANSONA/BLUEBIRD[1866]; VICAM-71/3/CIANO-67/SIETE-CERROS-66//KALYANSONA/BLUEBIR	AUS
37	Dirk	Pop2	1951	FORD/DUNDEE	AUS
38	Drysdale	Pop4	2001	HARTOG*3/QUARRION	AUS
39	EGA-Bonnie-Rock	Pop4	2002	Sr9e/3*WARIGAL//3*AROONA[3752]; 83-Z-1048/82-Z-1097[3752][3781]; 3-AG-3/4*CONDOR//3*MILLEWA/3/BODALLIN	AUS
40	EGA-Bounty	Pop1	2008	BATAVIA/2*LEICHHARDT	AUS
41	EGA-Bullaring	Pop4	2006	77-Z-893/81-Y-970	AUS
42	EGA-Burke	Pop4	2006	SUNCO/2*HARTOG	AUS
43	EGA-Castle-Rock	Pop1	2004	3-AG-3/4*COOK//2*CASCADES	AUS
44	EGA-Eagle-Rock	Pop4	2004	BLADE,AUS*2/SUNELG	AUS
45	EGA-Gregory	Pop1	2004	PELSART/2*BATAVIA	AUS
46	EGA-Kidman	Pop1	2008	(DH)PELSART/2*BATAVIA	AUS
47	EGA-Wentworth	Pop1	2004	JANZ*2/VULCAN	AUS
48	EGA-Wylie	Pop1	2004	QT-2327/COOK//QT-2804	AUS
49	Ellison	Pop4	2003	VICAM-71/3*SUNECA//SUN-231-A	AUS
50	Espada	Pop4	2008	(DH)RAC-875/KRICHAUFF//EXCALIBUR/KUKRI/3/RAC-875/KRICHAUFF/4/RAC-875//EXCALIBUR/KUKRI	AUS
51	Estoc	Pop2	2010	STYLET//(CO-6143)VM-931/RAC-935	AUS
52	Excalibur	Pop4	1990	RAC-177(Sr26)/UNICULM-492//RAC-311-S	AUS
53	Frame	Pop2	1997	MOLINEUX/3*DAGGER	AUS
54	Gamenya	Pop4	1958	KENYA-117-A/2*GABO//MENTANA/6*GABO[56][39]; GABO/3/GABO*5/MENTANA//GABO*2/KENYA-117-A[626]; GABO/4/GABO*5/MENTANA//2*GABO/3/KENYA-117-A	AUS
55	Gba-Ruby	Pop4	2003	IRENA/WEAVER	AUS
56	GBA-Sapphire	Pop1	2004	GBA-008/JANZ	AUS
57	Genaro-81	Pop3	1981	KAVKAZ/(SIB)BUHO//KALYANSONA/BLUEBIRD[114][144]; KAVKAZ/KALYANSONA/4/INIA-66//LERMA-ROJO-64/BLUEBIRD/3/2*BLUEBIRD	MEX
58	Giles	Pop1	1999	VULKAN/3*JANZ	AUS
59	Gladius	Pop4	2007	(DH)RAC-875/KRICHAUFF//EXCALIBUR/KUKRI/3/RAC-875/KRICHAUFF/4/RAC-875//EXCALIBUR/KUKRI	AUS
60	Glenlea	Pop4	1972	UM-530/(MEX)CB-100	CAN
61	Gluyas-Early	Pop4	1933	(S)WARDS-PROLIFIC	AUS
62	Goroke	Pop1	1993	TM-56*2/AUSEN-4-21//(77-702-D)3-AG-3/4*CONDOR	AUS
63	H46	Pop1			AUS
64	Halberd	Pop2	1969	SCIMITAR/KENYA-C-6042//BOBIN/3/INSIGNIA-49	AUS
65	Hartog	Pop4	1982	VICAM-71//CIANO-67(SIB)/SIETE-CERROS-66/3/KALYANSONA/BLUEBIRD	AUS
66	Houtman	Pop4	1993	BROCHIS(SIB)/HARTOG	AUS
67	Janz	Pop1	1989	3-AG-3/4*CONDOR//COOK	AUS
68	Kennedy	Pop1	1998	HARTOG/VEERY-5	AUS
69	Kite	Pop4	1973	NORIN-10/BREVOR(SEL.14)//4*EUREKA-2/3/T-A/3*FALCON/4/THATCHER/AG.EL(T-A)//4*FALCON/5/THATCHER/AG.EL(T-A)//5*FALCON	AUS
70	Klasic	Pop4	1982	KLEIN-RENDIDOR/2*SONORA-64//INIA-66/3/CIANO-67/4/YECORA-70	USA
71	Kukri	Pop4	1999	MADDEN/6*RAC-177//GRAJO/76-ECN-44[2964]; SR13*3//76-ECN-44/76-ECN-36[000]; CO-1213/RAC-549[3758]; DRP((FRONTANA/KENYA-58//N10B/G55)NAINARI-60)/(TOBARI-66/CIANO-67//TOBARI-66/8156/3/CALIDAD//BLUEBIRD/CIANO-67)/2/MADDEN/6*RAC-177	AUS
72	Kulin	Pop4	1986	BODALLIN(SIB)/(SIB)HYDEN	AUS
73	Lang	Pop1	2000	QT-3765/SUNCO	AUS
74	Livingston	Pop1	2008	SUN-129-A/SUNVALE	AUS
75	LRPB-Beaufort	Pop4	1930	MAJOR/GLUCLUB	AUS
76	LRPB-Cobra	Pop4	2011	WESTONIA/W-29	AUS
77	LRPB-Crusader	Pop4	2008	(DH)SUNBROOK/H-4	AUS
78	LRPB-Lincoln	Pop4	2007	96-WFHB-5568/OTANE//RUBRIC	NZL
79	LRPB-Scout	Pop2	2009	SUNSTATE/QH-71-6//YITPI	AUS
80	LRPB-Sentinel	Pop4	2005		AUS
81	LRPB-Spitfire	Pop4	2011	DRYSDALE/KUKRI	AUS
82	Mace	Pop4	2008	WYALKATCHEM/STYLET//WYALKATCHEM	AUS
83	Machete	Pop4	1985	MEC-3/2*GABO(RAC-177)//MADDEN	AUS
84	Magenta	Pop4	2007	CARNAMAH/TAMMIN-18	AUS
85	McKenzie	Pop4	1997	COLUMBUS/AMIDON	CAN
86	Merinda	Pop4	2008	JANZ/SUN-129-A	AUS
87	Mitre	Pop1	2000	JANZ/BEULAH	AUS
88	Mulgara	Pop1	2000	HARTOG/4*SUNCO	AUS
89	Navojoa	Pop4	1974	MAYA-2/ARMADILLO	MEX
90	Nyabing	Pop4	1994	3-AG-3/AROONA/4/CONDOR*4//3-AG-14/CONDOR/3/JABIRU	AUS
91	Olympic	Pop4	1956	BALDMIN/QUADRAT	AUS
92	Pastor	Pop4	1993	PFAU/SERI-82(CID-93300//BOBWHITE	MEX
93	Peake	Pop1	2007	VN-150/VN-715	AUS
94	Pelsart	Pop1	1994	POTAM-70/4*COOK	AUS
95	Perouse	Pop1	1989	3-AG-14/4*CONDOR,AUS//OXLEY/3*COOK	AUS
96	Petrie	Pop1	2000	VASCO/BATAVIA	AUS
97	Pugsley	Pop2	2002	FRAME/CORRIGIN//TRIDENT,AUS/3/FRAME	AUS
98	Qal-2000	Pop4	1999	LANCE*2/3/CONDOR*3//3-AG-14/CONDOR/4/4*TINCURRIN/5/TATIARA*3//COOK*5/VPM-1[2854]; TINCURRIN*4/3/LANCE*2/CONDOR*4/3-AG-14-14/TATIARA*3//COOK*5/VPM-	AUS
99	RAC-655	Pop4	NA	CHA/MENGAVI-8156//CIANO-67(SIB)/GALLO//BEZOSTAYA-2(CO-2224)/3/RAC-309-S	AUS
100	Rees	Pop4	2003	QUARRION/3*HARTOG	AUS
101	Reeves	Pop4	1989	BODALLIN//GAMENYA/INIA-66	AUS
102	Schomburgk	Pop4	1986	W-3589/OXLEY//2*WARIGAL/3/2*AROONA	AUS
103	Seri-M-82	Pop3	1982	KAVKAZ/(SIB)BUHO//KALYANSONA/BLUEBIRD	MEX
104	Sokoll	Pop4	2002	PASTOR/3/ALTAR-84/AE.SQ(TR.TA)//OPATA-M-85	MEX
105	Spear	Pop2	1983	RAC-111/INSIGNIA	AUS
106	Strzelecki	Pop1	2000	VICAM/4*BATAVIA	AUS
107	Stylet	Pop2	2001	MOLINEUX/2*TRIDENT	AUS
108	Sunbri	Pop1	1990	COOK*2/VPM-1//3*COOK	AUS
109	Sunco	Pop1	1986	SUN-9-E-27*4/3-AG-14//WW-15/3/3*COOK	AUS
110	Suneca	Pop4	1982	CIANO-67//SPICA/(AMBER-MUTANT)SONORA-64	AUS
111	Sunguard	Pop1	2011	SUN-289-E/Sr2-JANZ	AUS
112	Sunlin	Pop4	1996	SUNELG*2//SUNECA*3/VPM-1	AUS
113	Sunstate	Pop4	1993	HARTOG*4//COOK*5/VPM-1	AUS
114	Suntop	Pop4	2011	SUNCO/2*PASTOR//SUN-436-E	AUS
115	Sunvale	Pop1	1994	COOK*2/VPM-1//3*COOK	AUS
116	Sunzell	Pop4	2007	SUNBROOK*3/SUNSTATE	AUS
117	Tammarin-Rock	Pop4	2005	KALANNIE/81-Y-970	AUS
118	Thatcher	Pop4	1934	MARQUIS/(TR.DR)IUMILLO//(HN-3001)MARQUIS/KANRED	USA
119	Trident	Pop2	1993	VPM-1/5*COOK//4*SPEAR	AUS
120	Veery-5	Pop3	1981	KAVKAZ/(SIB)BUHO//KALYANSONA/BLUEBIRD	MEX
121	Ventura	Pop4	2004	SUNVALE/ROWAN	AUS
122	Vulcan	Pop1	1985	CONDOR/PITIC-62//(SIB)CONDOR	AUS
123	Waagan	Pop1	2009	JANZ/(CIMMYT)24-IBWSN-244	AUS
124	Wedin	Pop4			AUS
125	Westonia	Pop4	1997	CO-1190-203/84-W-127-501	AUS
126	Wilgoyne	Pop4	1988	CIANO-67/GALLO	AUS
127	Wl-711	Pop4	1976	SONALIKA/CHRIS//KALYANSONA	IND
128	Worrakatta	Pop4	1997	3-AG-3/AROONA/4/HALBERD/WARIMEK//PITIC-62/KLOKA/3/WARIQUAM	AUS
129	Wyalkatchem	Pop4	2001	MACHETE/3/(84-W-129-504)GUTHA//JACUP*2/11th-ISEPTON-135	AUS
130	Yandanooka	Pop4	2008	CALINGIRI/WAWHT-1137//38-W-386443	AUS
131	Yenda	Pop1	2006	BINDAWARRA/BOWIE,AUS//3-AG-3/WYUNA	AUS
132	Yitpi	Pop2	2000	C-8-MMC-8-HMM/FRAME	AUS
133	ZVS13-312	Pop3	NA	CHIBIA//PRLII/CM65531/3/SKAUZ/BAV92/4/MUNAL #1	MEX
134	ZVS13-316	Pop3	NA	PFAU/SERI.1B//AMAD/3/WAXWING/4/AKURI #1	MEX
135	ZVS13-385	Pop4	NA	TAM200/PASTOR//TOBA97/3/HEILO	MEX
136	ZVS13-404	Pop3	NA	SKAUZ/BAV92//CHUM18/7*BCN/3/HEILO/4/PAURAQ	MEX
137	ZVS13-406	Pop4	NA	CHUANMAI 43*2/3/ATTILA/3*BCN*2//BAV92	MEX
138	ZVS13-441	Pop4	NA	CHIBIA//PRLII/CM65531/3/SKAUZ/BAV92*2/4/GONDO/CBRD
139	ZWB10-126	Pop3	NA	PBW343*2/KHVAKI//PARUS/3/PBW343/PASTOR	MEX
140	ZWB10-44	Pop3	NA	ROLF07/7/CAL/NH//H567.71/3/SERI/4/CAL/NH//H567.71/5/2*KAUZ/6/PASTOR	MEX
141	ZWB10-76	Pop3	NA	FRET2*2/4/SNI/TRAP#1/3/KAUZ*2/TRAP//KAUZ*2/5/KIRITATI	MEX
142	ZWB11-153	Pop3	NA	ROLF07*2/5/REH/HARE//2*BCN/3/CROC_1/AE.SQUARROSA (213)//PGO/4/HUITES	MEX
143	ZWB11-172	Pop3	NA	WAXWING/4/BL 1496/MILAN/3/CROC_1/AE.SQUARROSA (205)//KAUZ/5/FRNCLN	MEX
144	ZWB11-33	Pop3	NA	SAUAL/KIRITATI//SAUAL	MEX
145	ZWB11-68	Pop3	NA	BAV92//IRENA/KAUZ/3/HUITES*2/4/CROC_1/AE.SQUARROSA (224)//KULIN/3/WESTONIA	MEX
146	ZWB11-91	Pop3	NA	BAV92//IRENA/KAUZ/3/HUITES*2/4/WHEAR	MEX
147	ZWB11-93	Pop3	NA	MUNAL #1/FRANCOLIN #1	MEX
148	ZWB11-94	Pop3	NA	MUNAL #1/FRANCOLIN #1	MEX
149	ZWB11-95	Pop3	NA	MUNAL #1/FRANCOLIN #1	MEX
150	ZWB12-103	Pop3	NA	WBLL1*2/BRAMBLING*2//HEILO	MEX
151	ZWB12-121	Pop3	NA	GRACK/CHYAK	MEX
152	ZWB12-122	Pop3	NA	FRNCLN/4/WHEAR/KUKUNA/3/C80.1/3*BATAVIA//2*WBLL1	MEX
153	ZWB12-123	Pop3	NA	FRNCLN/4/WHEAR/KUKUNA/3/C80.1/3*BATAVIA//2*WBLL1	MEX
154	ZWB12-124	Pop3	NA	FRNCLN/4/WHEAR/KUKUNA/3/C80.1/3*BATAVIA//2*WBLL1	MEX
155	ZWB12-14	Pop3	NA	KIRITATI//ATTILA*2/PASTOR/3/AKURI	MEX
156	ZWB12-147	Pop3	NA	WBLL1*2/KUKUNA//KIRITATI/2*TRCH	MEX
157	ZWB12-158	Pop3	NA	CHIBIA//PRLII/CM65531/3/FISCAL/4/ND643/2*WBLL1	MEX
158	ZWB12-16	Pop3	NA	KIRITATI/WBLL1//FRANCOLIN #1	MEX
159	ZWB12-168	Pop3	NA	ATTILA/3*BCN//BAV92/3/PASTOR/4/TACUPETO F2001*2/BRAMBLING/5/PAURAQ	MEX
160	ZWB12-17	Pop3	NA	KIRITATI/WBLL1//FRANCOLIN #1	MEX
161	ZWB12-18	Pop3	NA	KIRITATI/WBLL1//FRANCOLIN #1	MEX
162	ZWB12-187	Pop3	NA	FRANCOLIN #1/BECARD//FRNCLN	MEX
163	ZWB12-189	Pop3	NA	BAJ #1*2/KBIRD	MEX
164	ZWB12-193	Pop3	NA	TAM200/PASTOR//TOBA97/3/HEILO/4/PAURAQ	MEX
165	ZWB12-194	Pop3	NA	FRNCLN/HEILO//FRNCLN	MEX
166	ZWB12-202	Pop3	NA	SHORTENED SR26 TRANSLOCATION/4/ATTILA/3*BCN//BAV92/3/PASTOR/5/MUNAL	MEX
167	ZWB12-219	Pop3	NA	MUNAL #1/FRANCOLIN #1	MEX
168	ZWB12-24	Pop3	NA	MUU/AKURI #1	MEX
169	ZWB12-29	Pop3	NA	BAJ #1/3/KIRITATI//ATTILA*2/PASTOR	MEX
170	ZWB12-30	Pop3	NA	BAJ #1/3/KIRITATI//ATTILA*2/PASTOR	MEX
171	ZWB12-31	Pop3	NA	BAJ #1/3/KIRITATI//ATTILA*2/PASTOR	MEX
172	ZWB12-4	Pop3	NA	CHIBIA//PRLII/CM65531/3/SKAUZ/BAV92/4/MUNAL #1	MEX
173	ZWB12-42	Pop3	NA	MUNAL #1*2/5/OASIS/SKAUZ//4*BCN/3/PASTOR/4/KAUZ*2/YACO//KAUZ	MEX
174	ZWB12-62	Pop3	NA	KLEIN DON ENRIQUE*2/3/FRET2/WBLL1//TACUPETO F2001	MEX
175	ZWB12-63	Pop3	NA	KLEIN DON ENRIQUE*2/3/FRET2/WBLL1//TACUPETO F2001	MEX
176	ZWB12-67	Pop3	NA	FRNCLN*2/TECUE #1	MEX
177	ZWB12-86	Pop3	NA	WBLL1/KUKUNA//TACUPETO F2001*2/6/PVN//CAR422/ANA/5/BOW/CROW//BUC/PVN/3/YR/4/TRAP#1	MEX
